# Supplementary material for: Quinoxaline-2-carboxamide as a carrier ligand in two new platinum(ii) compounds: Synthesis, crystal structure, cytotoxic activity and DNA interaction
Source: Royal Society of Chemistry journal article supplement (doi:10.1039/c001158d), 2010-01-01
Supplement: c001158d.pdf [file c001158d.pdf]

## Supporting Information to the Dalton Transactions paper:

Quinoxaline-2-carboxamide as a carrier ligand in two new platinum(II) compounds: Synthesis, crystal structure, cytotoxic activity and DNA studies.

*Patricia Marqués-Gallego,<sup>a</sup> Maria Amparo Gamiz-Gonzalez,<sup>a</sup> Francisco R. Fortea-Pérez,<sup>a</sup> Martin Lutz,<sup>b</sup> Anthony L. Spek,<sup>b</sup> Andrej Pevec,<sup>c</sup> Bojan Kozlevcar,<sup>c</sup> Jan Reedijk<sup>a\*</sup>*

<sup>a</sup> Leiden Institute of Chemistry, Gorlaeus Laboratories, Leiden University PO Box 9502, 2300 RA Leiden, The Netherlands

<sup>b</sup> Bijvoet Center for Biomolecular Research, Crystal and Structural Chemistry, Utrecht University

Padualaan 8, 3584 CH, Utrecht, The Netherlands

<sup>c</sup> Faculty of Chemistry and Chemical Technology, University of Ljubljana, Aškerčeva 5, SI-1000 Ljubljana, Slovenia

List of contents:

1. **X-ray Crystallographic Analysis and Data collection.**
2. **Table S1.** Crystal data and structure refinement details for **1** and **2**.
3. **Figure S1.** <sup>195</sup>Pt NMR spectrum (300 MHz) of **1** in DMF-d<sub>7</sub> at 37 °C reacted with 1 equiv. 9-EtG in D<sub>2</sub>O 24 h after mixing.
4. **Figure S2.** ESI-MS spectrum of **1** in DMF 24 h after mixing with 1 equiv. of 9EtG in H<sub>2</sub>O.
5. **Figure S3.** <sup>1</sup>H NMR spectrum (300 MHz) of **2** in DMF-d<sub>7</sub> at 37 °C reacted with 1 equiv. 9-EtG in D<sub>2</sub>O fresh (bottom spectrum) and 24 h after mixing (top spectrum).
6. **Figure S4.** <sup>195</sup>Pt NMR spectrum (300 MHz) of **2** in DMF-d<sub>7</sub> at 37 °C reacted with 1 equiv. 9-EtG in D<sub>2</sub>O 24 h after mixing
7. **Figure S5.** ESI-MS spectrum of **2** in DMF 24 h after mixing with 1 equiv. of 9EtG in H<sub>2</sub>O.
8. **References**

**X-ray Crystallographic Analysis and Data collection.** The molecular structure of complexes **1** and **2** were determined by single-crystal X-ray diffraction methods. Single crystals of *cis*-[Pt(qnxca)(MeCN)Cl<sub>2</sub>] (**1**) were obtained by slow evaporation of its acetonitrile solution, while a single crystal of [Pt(qnxca<sub>-H</sub>)(dmsO)Cl] (**2**) was obtained by slow diffusion of dimethylsulfoxide into the aqueous solution of the alkaline reaction mixture. Crystal data, data collection parameters, and structure refinement details are given in Table S1. Cif files are available as supporting information.

X-ray intensities were collected on a Nonius KappaCCD diffractometer with sealed tube (Mo-K $\alpha$ , graphite monochromator,  $\lambda = 0.71073 \text{ \AA}$ , compound **1**) or on a Nonius KappaCCD diffractometer with rotating anode (Mo-K $\alpha$ , graphite monochromator,  $\lambda = 0.71073 \text{ \AA}$ , compound **2**). A suitable crystal was greased to the end of a glass thread (compound **1**) or oil mounted on top of a Lindemann capillary (compound **2**). The data were integrated using DENZO<sup>1</sup> (compound **1**) or EvalCCD<sup>2</sup> (compound **2**). The structures were solved by direct methods implemented in SHELXS-97<sup>3</sup> (compound **1**) or automated Patterson methods with DIRDIF-99<sup>4</sup> (compound **2**) and refined by a full-matrix least-squares procedure based on  $F^2$  with SHELXL-97<sup>3</sup>. All non-hydrogen atoms were refined anisotropically. The C-bound H atoms were positioned geometrically (C – H = 0.96  $\text{\AA}$  and 0.93  $\text{\AA}$  for methyl and aromatic carbon atom respectively) and refined as riding, with  $U_{\text{iso}}(\text{H}) = 1.2$  or 1.5 times  $U_{\text{eq}}(\text{C})$ . The N-bound hydrogen atoms were located in a difference map and refined using distance restraints (DFIX) with N – H = 0.86  $\text{\AA}$  and with  $U_{\text{iso}}(\text{H}) = 1.2 U_{\text{eq}}(\text{N})$  (compound **1**) or refined freely with isotropic displacement parameters (compound **2**).

**Table S1.** Crystal data and structure refinement details for **1** and **2**.

|                                            | <b>1</b>                                                          | <b>2</b>                                                            |
|--------------------------------------------|-------------------------------------------------------------------|---------------------------------------------------------------------|
| Chemical formula                           | C <sub>11</sub> H <sub>10</sub> N <sub>4</sub> OPtCl <sub>2</sub> | C <sub>11</sub> H <sub>12</sub> ClN <sub>3</sub> O <sub>2</sub> PtS |
| Formula weight [g/mol]                     | 480.21                                                            | 480.84                                                              |
| T [K]                                      | 293(2)                                                            | 150(2)                                                              |
| Crystal system                             | Monoclinic                                                        | Monoclinic                                                          |
| Space group                                | P2 <sub>1</sub> /c                                                | P2 <sub>1</sub> /c                                                  |
| a [Å]                                      | 8.2756(2)                                                         | 10.3211(3)                                                          |
| b [Å]                                      | 8.8185(2)                                                         | 18.9564(7)                                                          |
| c [Å]                                      | 19.8387(5)                                                        | 7.0183(2)                                                           |
| β [deg]                                    | 99.4107(8)                                                        | 105.028(1)                                                          |
| V [Å <sup>3</sup> ]                        | 1428.31(6)                                                        | 1326.17(7)                                                          |
| Z                                          | 4                                                                 | 4                                                                   |
| D <sub>calc</sub> [g/cm <sup>3</sup> ]     | 2.233                                                             | 2.408                                                               |
| μ [mm <sup>-1</sup> ]                      | 10.194                                                            | 10.939                                                              |
| Crystal size [mm <sup>3</sup> ]            | 0.13 x 0.25 x 0.38                                                | 0.03 x 0.04 x 0.36                                                  |
| Crystal colour                             | yellow                                                            | red                                                                 |
| abs.corr. method                           | multi-scan                                                        | analytical                                                          |
| abs.corr. range                            | 0.11-0.35                                                         | 0.13-0.60                                                           |
| sin(θ/λ) <sub>max</sub> [Å <sup>-1</sup> ] | 0.65                                                              | 0.61                                                                |
| Refl. (measured/unique)                    | 6124/3255                                                         | 20861/2484                                                          |
| R <sub>int</sub>                           | 0.029                                                             | 0.066                                                               |
| Parameters/restraints                      | 180/2                                                             | 178/0                                                               |
| R1/wR2 (I/σ(I) > 2)                        | 0.0337/0.0786                                                     | 0.0323/0.0774                                                       |
| R1/wR2 (all data)                          | 0.0481/0.0849                                                     | 0.0431/0.0824                                                       |
| S                                          | 1.01                                                              | 1.10                                                                |
| Residual density [e/Å <sup>3</sup> ]       | -1.43, 1.25                                                       | -1.47, 2.18                                                         |

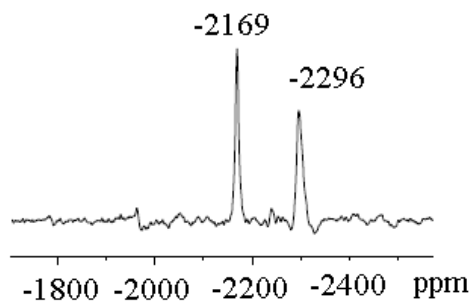

**Figure S1.**  $^{195}\text{Pt}$  NMR spectrum (300 MHz) of **1** in  $\text{DMF-d}_7$  at  $37^\circ\text{C}$  reacted with 1 equiv. 9-EtG in  $\text{D}_2\text{O}$  24 h after mixing.

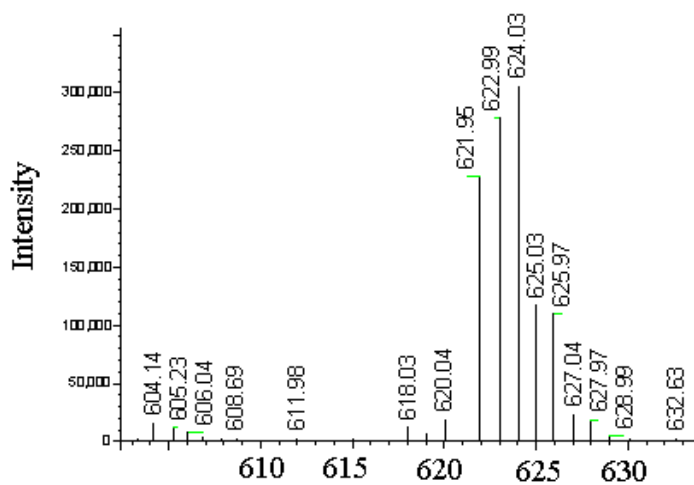

**Figure S2.** ESI-MS spectrum of **1** in DMF 24 h after mixing with 1 equiv. of 9EtG in  $\text{H}_2\text{O}$ . Peak at  $m/z = 624$  corresponding to  $[\text{Pt}(\text{qnxca})(9\text{EtG})(\text{MeCN})\text{Cl}]^+$  species.

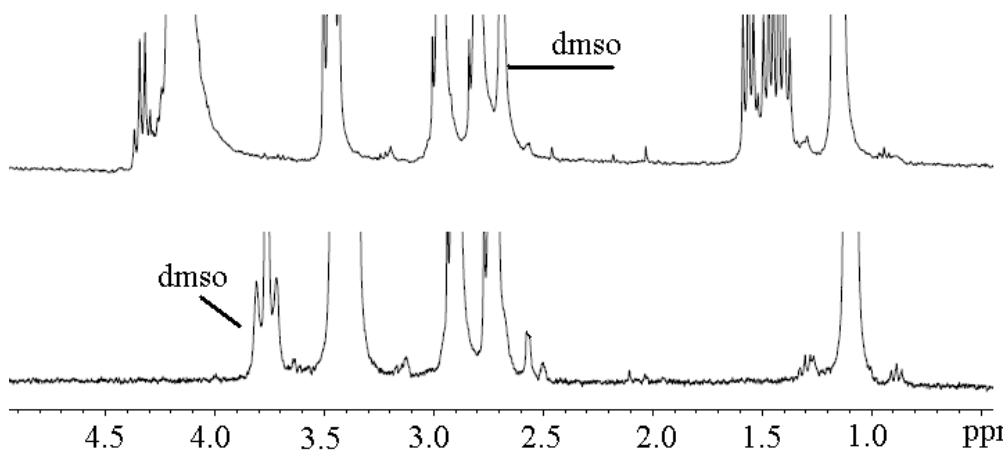

**Figure S3.**  $^1\text{H}$  NMR spectrum (300 MHz) of **2** in DMF- $\text{d}_7$  at 37 °C reacted with 1 equiv. 9-EtG in  $\text{D}_2\text{O}$  fresh (bottom spectrum) and 24 h after mixing (top spectrum).

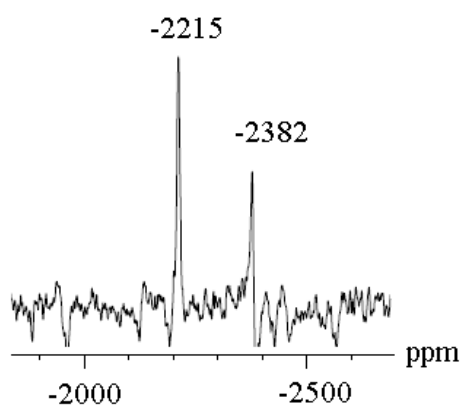

**Figure S4.**  $^{195}\text{Pt}$  NMR spectrum (300 MHz) of **2** in DMF- $\text{d}_7$  at 37 °C reacted with 1 equiv. 9-EtG in  $\text{D}_2\text{O}$  24 h after mixing.

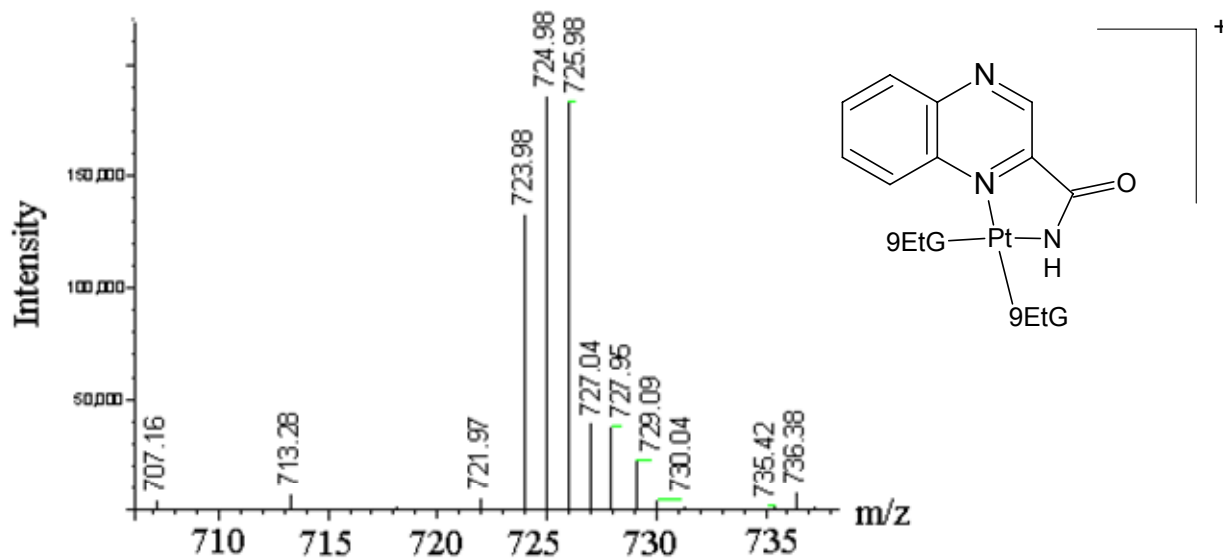

**Figure S5.** ESI-MS spectrum of **2** in DMF 24 h after mixing with 1 equiv. of 9EtG in H<sub>2</sub>O.

Peak at  $m/z = 724$  corresponding to  $[\text{Pt}(\text{qnxca-H})(9\text{EtG})_2]^+$  species.

## References

1. Z. Otwinowski, W. Minor, *Methods Enzymol.* **276** (1997) 307.
2. A.J.M. Duisenberg, L.M.J. Kroon-Batenburg, A.M.M. Schreurs, *J. Appl. Cryst.* **36** (2003), 220-229.
3. G. M. Sheldrick, *Acta Cryst. A64* (2008), 112-122.
4. P.T. Beurskens, G. Admiraal, G. Beurskens, W.P. Bosman, S. Garcia-Granda, R.O. Gould, J.M.M. Smits, C. Smykalla (1999) The DIRDIF99 program system, Technical Report of the Crystallography Laboratory, University of Nijmegen, The Netherlands.
